# Supplementary material
Source: Springer Nature journal article supplement (https://www.springermedizin.de/resource/supplementary/12967_2013_1901_MOESM6_ESM.pdf/9575078)

**a**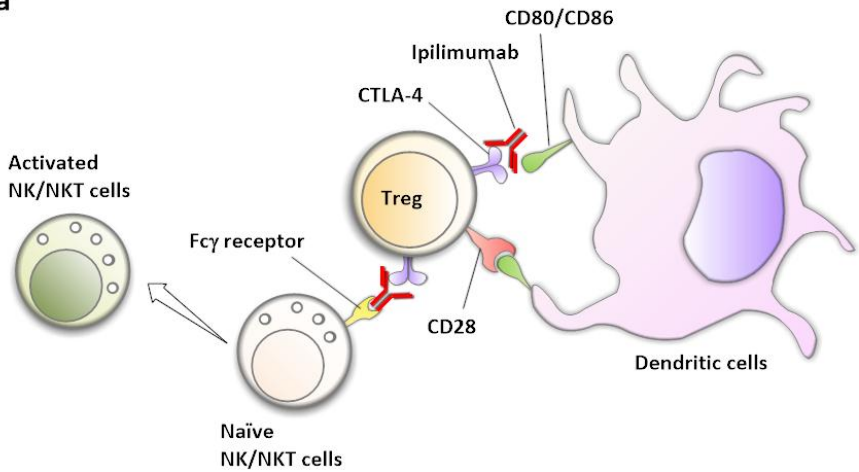**b**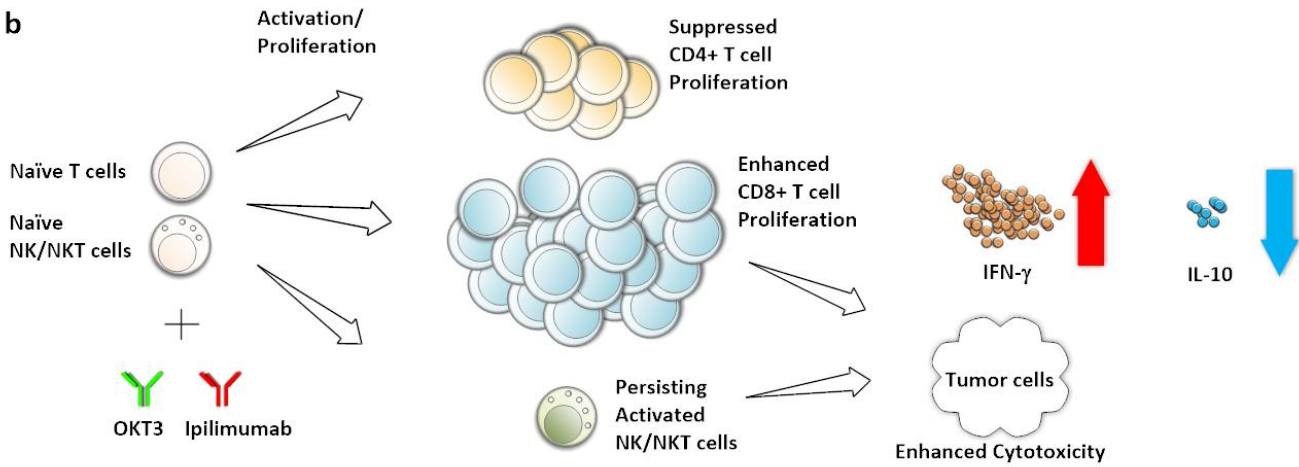

Supplement: MOESM6 [file 9575078]
